# Supplementary material
Source: publisher site journal article supplement (https://www.dovepress.com/article/supplementary_file/600646/600646%20Revised%20Supplementary%20Tables.docx)
Supplement: Supplementary file 1 [file 600646%20Revised%20Supplementary%20Tables.docx]

**Supplementary Table S1-A. Logistic Regression for Meeting ACR 2020 ULT Indications**

| Variables | | OR | OR Lower 95% CI | OR Upper 95% CI | p-value |
| --- | --- | --- | --- | --- | --- |
| Age | | 1.012 | 0.968 | 1.057 | 0.612 |
| Gender | Male vs Female | 2.065 | 0.579 | 7.371 | 0.264 |
| Number of flares | 0 Flares vs ND | 0.923 | 0.167 | 5.087 | 0.927 |
| ≥ 1 Flares vs ND | **4.708** | **1.423** | **15.575** | **0.011** |
| Specialty | Primary Care vs Rheumatology | **0.047** | **0.014** | **0.162** | **< 0.001** |
| Other Specialties vs Rheumatology | 0.203 | 0.033 | 1.270 | 0.088 |
| Baseline SUA level |  | 3.760 | 0.276 | 51.254 | 0.320 |

**Supplementary Table S1-B. Logistic Regression for SUA Monitoring Within 6 Months of ULT Initiation**

| Variables | | OR | OR Lower 95% CI | OR Upper 95% CI | | p-value |
| --- | --- | --- | --- | --- | --- | --- |
| Age | | 0.976 | 0.943 | 1.010 | 0.159 | |
| Male vs Female |  | 0.904 | 0.358 | 2.282 | 0.831 | |
| Meets ACR 2020 ULT Indications |  | 2.392 | 0.634 | 9.030 | 0.198 | |
| Number of flares | 0 Flares | 0.768 | 0.278 | 2.123 | 0.611 | |
| ≥ 1 Flares | 0.698 | 0.223 | 2.183 | 0.537 | |
| Specialty | Primary Care vs Rheumatology | 0.662 | 0.204 | 2.154 | 0.493 | |
| Other Specialties vs Rheumatology | 0.217 | 0.029 | 1.637 | 0.138 | |
| CKD |  | 0.720 | 0.145 | 3.587 | 0.688 | |
| Baseline SUA level |  | 1.588 | 0.130 | 19.323 | 0.717 | |

**Supplementary Table S1-C. Logistic Regression for SUA <6 mg/dL at 12 Months**

| Variables | | | | | OR | OR Lower 95% CI | OR Upper 95% CI | p-value |
| --- | --- | --- | --- | --- | --- | --- | --- | --- |
| Age | | | | | **0.969** | **0.922** | **0.998** | **0.042** |
| Male vs Female | | | | | **0.292** | **0.102** | **0.833** | **0.021** |
| Meets ACR 2020 ULT Indications | | | |  | 2.602 | 0.548 | 12.354 | 0.229 |
| Number of flares |  | 0 Flares | | | 2.720 | 0.918 | 8.057 | 0.071 |
|  | ≥ 1 Flares | | | 1.280 | 0.376 | 4.356 | 0.693 |
| Specialty |  | Primary Care vs Rheumatology | | | **0.232** | **0.061** | **0.886** | **0.033** |
|  | Other Specialties vs Rheumatology | | | 0.268 | 0.034 | 2.120 | 0.212 |
| CKD | |  | | | 0.528 | 0.092 | 3.036 | 0.474 |
| Baseline SUA level | | |  | | 0.340 | 0.034 | 3.384 | 0.358 |

**Supplementary Table S1-D. Logistic Regression for Receipt of Appropriate Anti-inflammatory Prophylaxis**

| Variables | | OR | OR Lower 95% CI | OR Upper 95% CI | p-value |
| --- | --- | --- | --- | --- | --- |
| Age | | 0.983 | 0.93 | 1.041 | 0.562 |
| Male vs Female |  | 0.144 | 0.02 | 1.017 | 0.052 |
| Meets ACR 2020 ULT Indications |  | **26.242** | **3.397** | **202.7** | **0.002** |
| Specialty | Primary Care vs Rheumatology | 0.414 | 0.069 | 2.471 | 0.333 |
| Other Specialties vs Rheumatology | 1.186 | 0.148 | 9.513 | 0.872 |
| Baseline SUA level |  | 1.476 | 0.051 | 42.478 | 0.820 |

ACR = American College of Rheumatology; CKD = chronic kidney disease; ND = not documented; SUA = serum uric acid; ULT = urate-lowering therapy.

Bold denotes statistical significance (p<0.05).
